# Supplementary material
Source: PubMed Central journal article supplement (PMC2662244)
Supplement: M804707200_1.pdf [file M804707200_1.pdf]

**Supplemental Figure 1: Cell imaging and surface expression of WT and SS TRPC3.** (a) Fura2AM measurements were made in HEK293 cells transfected for 24 h with either YFP alone (con) or YFP + full-length WT, K202A/R204A (KR), S209R/S213F (SS), or S209R (S) TRPC3 mutants. Cells were acclimated first in nominally  $\text{Ca}^{2+}$ -free medium, then in 1 mM  $\text{Sr}^{2+}$  containing media (bar), and then challenged with 100  $\mu\text{M}$  OAG (arrow). (b) Fura2AM measurements were made in HEK293 cells transfected as in (a).  $\text{Ca}^{2+}$  pools were released in cells by carbachol (CCH, 100  $\mu\text{M}$ ) (first bar), in nominally  $\text{Ca}^{2+}$ -free medium followed by replacement with CCH and 1mM  $\text{Sr}^{2+}$  containing media (arrow). For a-b, these traces are quantified in the bar graphs in main text Figure 2b. (c) Confocal microscopy of HeLa cells transfected with either YFP-tagged full-length WT or SS TRPC3. Inset: magnification. (d) Total Internal Reflection Fluorescence of HEK293 cells stably transfected with either YFP-tagged full-length WT or SS TRPC3. These cells were stimulated with 100  $\mu\text{M}$  carbachol (CCH). Arrows depict TRPC3 regions which increase over time. See Supplemental Movies for real-time TIRF experiments. (e) Graphical schematic of data collection for Fluorescence Recovery After Photobleaching (FRAP) and Fluorescence Loss In Photobleaching (FLIP) experiments (see Methods).

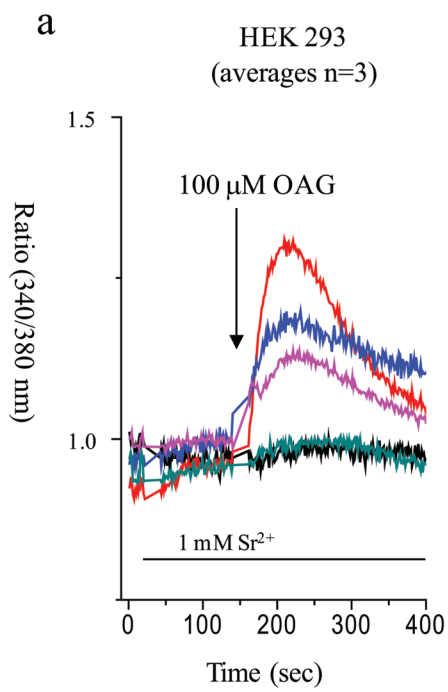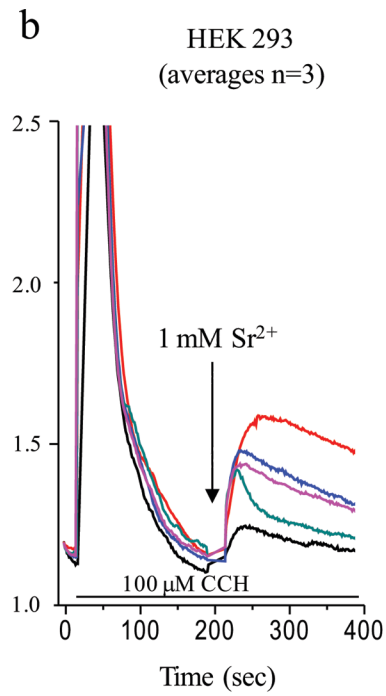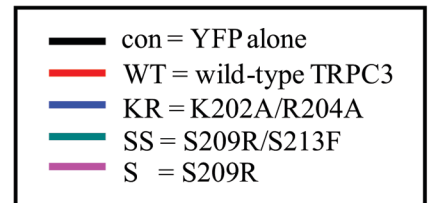

C

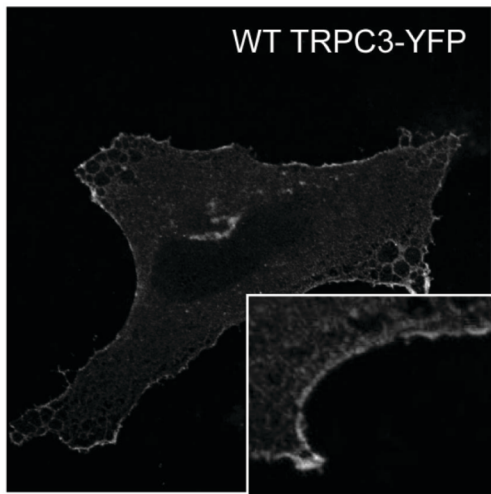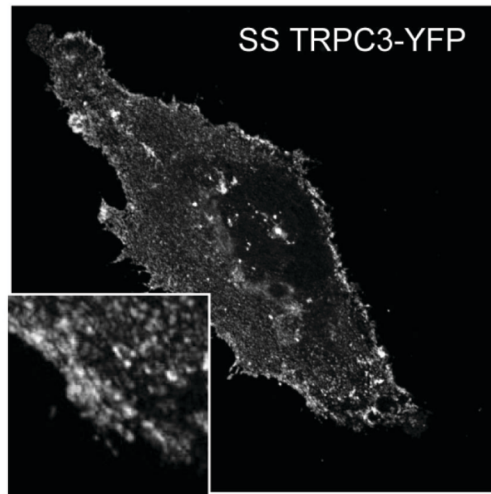

d

Total Internal Reflection Fluorescence

WT TRPC3-YFP

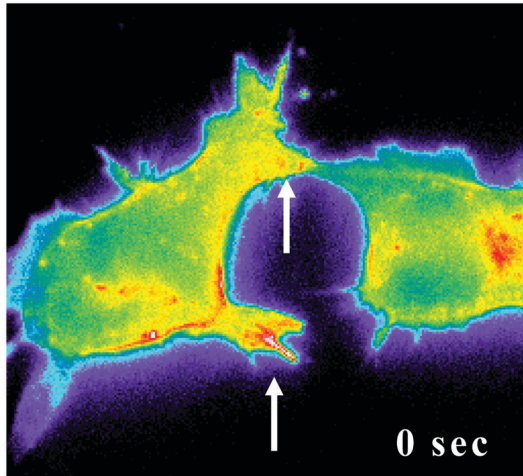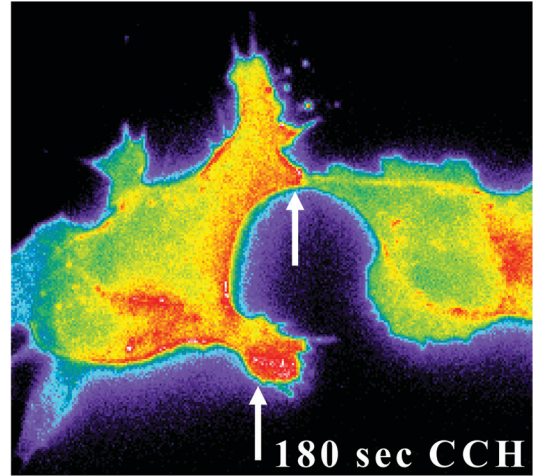

SS TRPC3-YFP

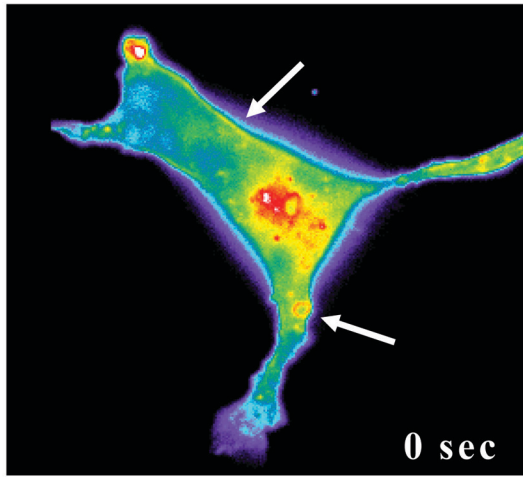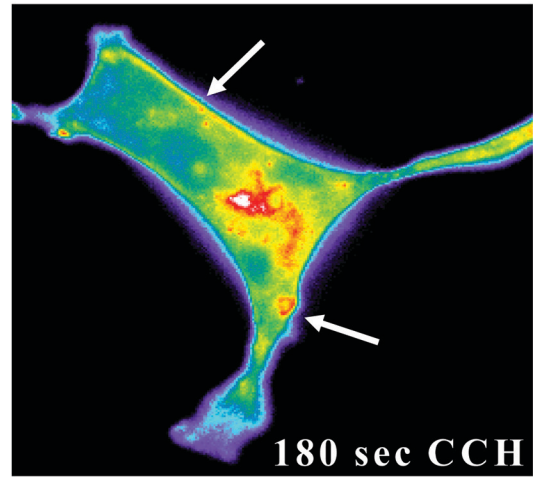

e Fluorescence recovery after photobleaching (FRAP)

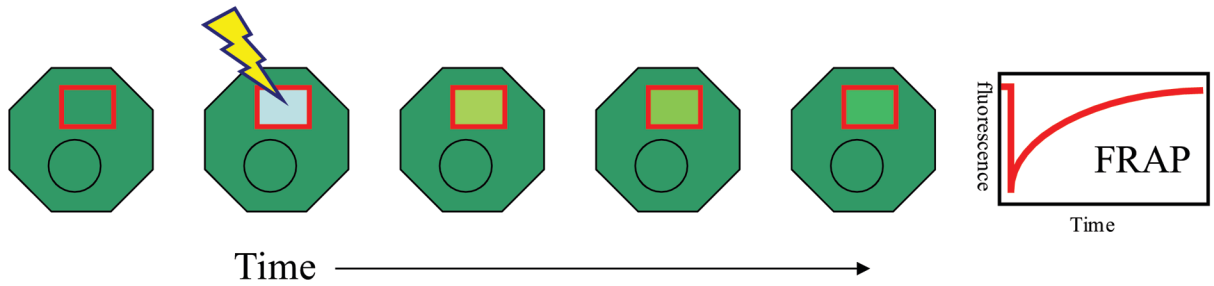

Fluorescence loss in photobleaching (FLIP)

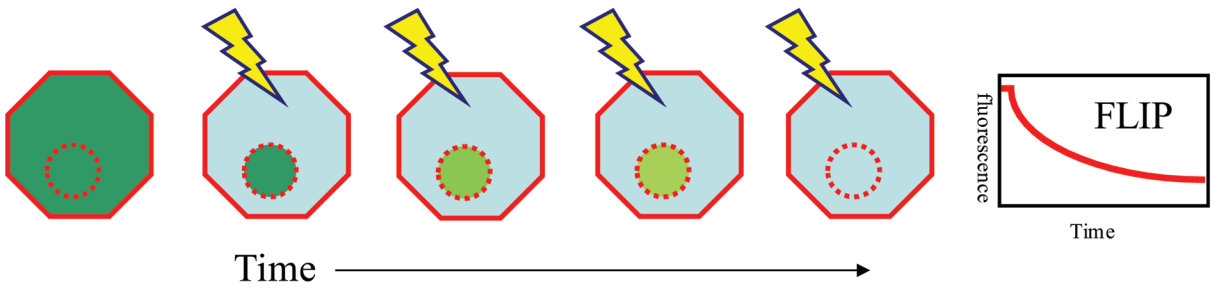

- Bleached Region of Interest (ROI)
- - - Unbleached ROI
